# Supplementary material for: SensiScreen® KRAS exon 2-sensitive simplex and multiplex real-time PCR-based assays for detection of KRAS exon 2 mutations
Source: PubMed Central journal article supplement (PMC5479524; doi:10.1371/journal.pone.0178027), 2017-06-21

S1 Fig

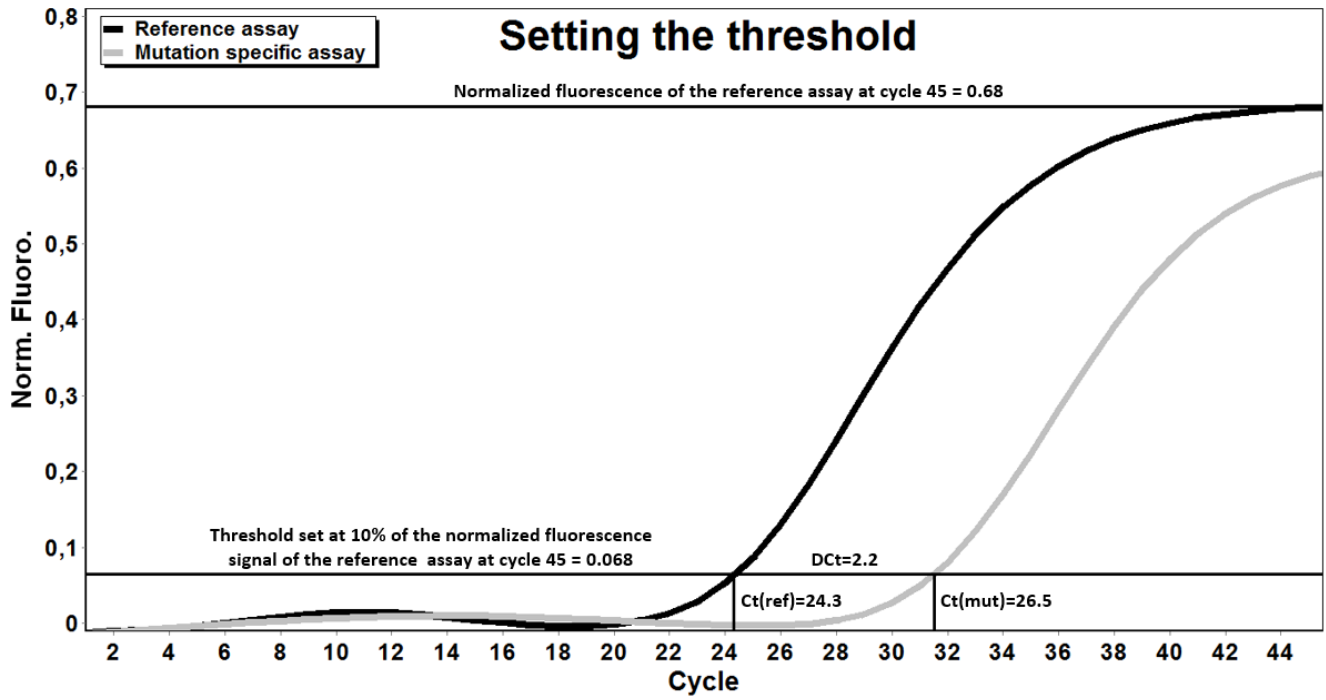

Supplement: pone.0178027.s001.pdf [file pone.0178027.s001.pdf]
