# Supplementary material for: SensiScreen® KRAS exon 2-sensitive simplex and multiplex real-time PCR-based assays for detection of KRAS exon 2 mutations
Source: PubMed Central journal article supplement (PMC5479524; doi:10.1371/journal.pone.0178027), 2017-06-21
Supplement: pone.0178027.s004.pdf [file pone.0178027.s004.pdf]

## S1 Table

| <b>Primer name</b>                   | <b>Primer sequence 5' -&gt; 3'</b>                       |
|--------------------------------------|----------------------------------------------------------|
| KRAS cloning forward                 | <i>AAAGGTACTGGTGGAGTATTTGATAG</i>                        |
| KRAS cloning reverse                 | <i>ACAAGATTTACCTCTATTGTTGGATC</i>                        |
| DS forward                           | <i>TGGTGGAGTATTTGATAGTGTA</i>                            |
| DS reverse                           | <i>CATGAAAATGGTCAGAGAA</i>                               |
| ME-PCR forward (1. PCR)              | <i>ACTGAATATAAACTTGTGGTAGTTGGACCT</i>                    |
| ME-PCR reverse (1. PCR)              | <i>ACTCATGAAAATGGTCAGAGAAACCTTTAT</i>                    |
| ME-PCR forward (2. PCR)              | <i>ACTGAATATAAACTTGTGGTAGTTGGACCT</i>                    |
| ME-PCR reverse (2. PCR)              | <i>TCAAAGAATGGTCCTGGACC</i>                              |
| SensiScreen® G12A forward            | <i>AAACTTGTGGTAGTTGGAGCTTC</i>                           |
| SensiScreen® G12D forward            | <i>AAACTTGTGGTAGTTGGAGCCGA</i>                           |
| SensiScreen® G12R forward            | <i>AACTTGTGGTAGTTGGAGTTC</i>                             |
| SensiScreen® G12C forward            | <i>AAACTTGTGGTAGTTGGAGCCT</i>                            |
| SensiScreen® G12S forward            | <i>AAACTTGTGGTAGTTGGAGGTA</i>                            |
| SensiScreen® G12V forward            | <i>ACTTGTGGTAGTTGGAGCCGT</i>                             |
| SensiScreen® G13D forward            | <i>GTGGTAGTTGGAGCTGGAGA</i>                              |
| SensiScreen® reverse                 | <i>TACCTCTATTGTTGGATCATATTCGT</i>                        |
| SensiScreen® probe                   | <i>Penta Green™-AGCTGTATCGTCAAGGCACTC-Green Quencher</i> |
| SensiScreen® blocker                 | <i>AGCTGGTGGCGTAGG</i>                                   |
| SensiScreen internal control probe   | <i>Penta Yellow™-CTACTCCACTGCTGTCTAT-Yellow Quencher</i> |
| SensiScreen internal control forward | <i>CCCTAGAGTTGCCACAGC</i>                                |
| SensiScreen internal control reverse | <i>GGTAAGCAGCAAGAGAGC</i>                                |
