# Supplementary material for: SensiScreen® KRAS exon 2-sensitive simplex and multiplex real-time PCR-based assays for detection of KRAS exon 2 mutations
Source: PubMed Central journal article supplement (PMC5479524; doi:10.1371/journal.pone.0178027), 2017-06-21
Supplement: pone.0178027.s005.pdf [file pone.0178027.s005.pdf]

## S2 Table

| Cell line                | Mutation                 | Zygoty       | Origin            |
|--------------------------|--------------------------|--------------|-------------------|
| SW1116 (ATCC® CCL-233™)  | Gly12Arg (G12A, c.35G>C) | Homozygous   | Colorectal cancer |
| MICOL29*                 | Gly12Asp (G12D, c.35G>A) | Homozygous   | Colorectal cancer |
| CAL-62 (DSMZ®, ACC-448™) | Gly12Arg (G12R, c.34G>C) | Homozygous   | Thyroid cancer    |
| A549 (ATCC® CCL-185™)    | Gly12Ser (G12S, c.34G>A) | Homozygous   | Lung cancer       |
| SW480 (ATCC® CCL-228™)   | Gly12Val (G12V, c.35G>T) | Homozygous   | Colorectal cancer |
| T84 (ATCC® CCL-248™)     | Gly13Asp (G13D, c.38G>A) | Heterozygous | Colorectal cancer |
