# Supplementary material for: SensiScreen® KRAS exon 2-sensitive simplex and multiplex real-time PCR-based assays for detection of KRAS exon 2 mutations
Source: PubMed Central journal article supplement (PMC5479524; doi:10.1371/journal.pone.0178027), 2017-06-21
Supplement: pone.0178027.s006.pdf [file pone.0178027.s006.pdf]

**S3 Table**

| <b>Patient</b> | <b>Sex</b> | <b>Age</b> | <b>Localization</b>    | <b>TNM</b>  |
|----------------|------------|------------|------------------------|-------------|
| 1              | M          | 56         | sigmoid colon          | pT3/pN0     |
| 2              | M          | 80         | sigmoid colon          | pT3/pN0     |
| 3              | F          | 69         | sigmoid colon          | pT1/pN0     |
| 4              | M          | 67         | sigmoid colon          | pT3/pN0     |
| 5              | M          | 93         | sigmoid colon          | pT3/pN0     |
| 6              | F          | 78         | rectum                 | pT2         |
| 7              | M          | 56         | cecum                  | pT4/pN1     |
| 8              | M          | 74         | cecum                  | pT4         |
| 9              | M          | 61         | sigmoid colon          | pT3/pN1     |
| 10             | M          | 71         | sigmoid colon          | pT3         |
| 11             | M          | 69         | hepatic flexure        | pT4         |
| 12             | F          | 91         | cecum                  | pT3         |
| 13             | M          | 75         | sigmoid colon          | pT4         |
| 14             | M          | 83         | transverse colon       | pT3/pN0     |
| 15             | M          | 76         | ascending colon/cecum  | pT3/pN2/pM1 |
| 16             | F          | 81         | cecum                  | pT3/pN0     |
| 17             | F          | 75         | cecum                  | pT4/pN2     |
| 18             | M          | 71         | descending colon/cecum | pT3         |
| 19             | F          | 71         | hepatic flexure        | pT3/pN1     |
| 20             | F          | 75         | sigmoid colon          | pT3/pN0     |
| 21             | M          | 84         | sigmoid colon          | pT3         |
| 22             | M          | 79         | ascending colon/cecum  | pT3/pN0     |
| 23             | M          | 71         | sigmoid colon          | pT3/pN1     |
| 24             | M          | 73         | rectum                 | pT3/pN0     |
| 25             | M          | 61         | sigmoid colon          | pT3/pN2     |
| 26             | F          | 90         | rectum                 | pT3/pN1     |
| 27             | M          | 80         | cecum                  | pT3/pN0     |
| 28             | F          | 91         | sigmoid colon          | pT3/pN1     |
| 29             | F          | 83         | sigmoid colon          | pT3/pN2     |
| 30             | F          | 81         | sigmoid colon / rectum | pT4/pN1     |
| 31             | M          | 62         | sigmoid colon          | pT4         |
| 32             | M          | 81         | rectum                 | pT3         |
| 33             | F          | 96         | sigmoid colon          | pT4         |
| 34             | F          | 59         | transverse colon       | pT4/pN0     |
| 35             | M          | 76         | ascending colon/cecum  | pT3/pN1     |
| 36             | M          | 77         | cecum                  | pT3/pN0     |
| 37             | F          | 73         | ascending colon        | pT3/pN2     |
| 38             | F          | 73         | sigmoid colon          | pT4         |
| 39             | F          | 81         | ascending colon        | pT2/pN0     |
| 40             | F          | 46         | ascending colon        | pT2/pN0     |
| 41             | M          | 79         | descending colon       | pT3         |
| 42             | F          | 80         | hepatic flexure        | pT2/pN1     |
| 43             | F          | 70         | ascending colon        | pT4/pN1     |
| 44             | F          | 66         | descending colon       | pT3         |
| 45             | F          | 64         | cecum                  | pT3         |
| 46             | F          | 69         | transverse colon       | pT3/pN0     |
| 47             | M          | 84         | rectum                 | pT2/pN0     |
| 48             | M          | 49         | ascending colon        | pT3/pN2     |
| 49             | M          | 60         | sigmoid colon          | pT3         |
| 50             | M          | 71         | rectum                 | pT4/pN0     |
| 51             | M          | 64         | ascending colon        | pT3/pN1     |

|     |   |    |                        |         |
|-----|---|----|------------------------|---------|
| 52  | F | 70 | ascending colon        | pT3     |
| 53  | M | 70 | ascending colon        | pT3/pN0 |
| 54  | F | 65 | sigmoid colon          | pT2/pN0 |
| 55  | F | 77 | ascending colon        | pT3/pN0 |
| 56  | F | 81 | sigmoid colon          | pT4/pN0 |
| 57  | F | 72 | sigmoid colon          | pT3     |
| 58  | M | 83 | ascending colon        | pT3     |
| 59  | F | 87 | descending colon       | pT4/pN1 |
| 60  | M | 77 | rectum                 | pT3/pN1 |
| 61  | F | 80 | cecum                  | pT3     |
| 62  | M | 76 | hepatic flexure        | pT3/pN2 |
| 63  | M | 78 | cecum                  | pT3     |
| 64  | M | 77 | sigmoid colon          | pT1     |
| 65  | M | 76 | splenic flexure        | pT4/pN1 |
| 66  | F | 59 | descending colon       | pT1     |
| 67  | M | 61 | ascending colon        | pT4     |
| 68  | M | 88 | sigmoid colon          | pT3     |
| 69  | F | 78 | ascending colon        | pT2     |
| 70  | M | 47 | hepatic flexure        | pT3/pN0 |
| 71  | F | 78 | cecum                  | pT3     |
| 72  | F | 60 | ascending colon        | pT4/pN0 |
| 73  | M | 50 | sigmoid colon / rectum | pT4/pN2 |
| 74  | F | 71 | cecum                  | pT3/pN1 |
| 75  | M | 74 | hepatic flexure        | pT2     |
| 76  | F | 93 | cecum                  | pT4/pN1 |
| 77  | M | 65 | transverse colon       | pT3/pN0 |
| 78  | F | 90 | cecum                  | pT4/pN0 |
| 79  | M | 60 | sigmoid colon          | pT2     |
| 80  | M | 77 | cecum                  | pT4     |
| 81  | M | 78 | cecum                  | pT3     |
| 82  | F | 78 | sigmoid colon          | pT3/pN1 |
| 83  | M | 42 | descending colon       | pT3/pN0 |
| 84  | F | 65 | hepatic flexure        | pT3/pN1 |
| 85  | F | 62 | sigmoid colon / rectum | pT3     |
| 86  | F | 61 | cecum                  | pT2/pN0 |
| 87  | M | 85 | hepatic flexure        | pT3/pN0 |
| 88  | F | 78 | descending colon       | pT4/pN2 |
| 89  | F | 87 | descending colon       | pT4/pN0 |
| 90  | F | 80 | sigmoid colon          | pT3/pN0 |
| 91  | F | 84 | cecum                  | pT3/pN1 |
| 92  | M | 73 | descending colon       | pT3/pN0 |
| 93  | F | 54 | ascending colon        | pT2/pN0 |
| 94  | M | 82 | hepatic flexure        | pT3/pN0 |
| 95  | M | 64 | cecum                  | pT3/pN2 |
| 96  | M | 88 | splenic flexure        | pT3/pN0 |
| 97  | F | 69 | transverse colon       | pT4     |
| 98  | F | 85 | cecum                  | pT3/pN0 |
| 99  | F | 85 | ascending colon        | pT2/pN0 |
| 100 | F | 72 | rectum                 | pT2/pN0 |
