# Supplementary material for: SensiScreen® KRAS exon 2-sensitive simplex and multiplex real-time PCR-based assays for detection of KRAS exon 2 mutations
Source: PubMed Central journal article supplement (PMC5479524; doi:10.1371/journal.pone.0178027), 2017-06-21
Supplement: pone.0178027.s007.pdf [file pone.0178027.s007.pdf]

**S4 Table**

| <b>Patient</b> | <b>Sex</b> | <b>Age</b> | <b>Localization</b>       | <b>TNM</b>  |
|----------------|------------|------------|---------------------------|-------------|
| 1              | M          | 73         | biopsy (sigmoid colon)    | ND          |
| 2              | F          | 68         | ascending colon           | ND          |
| 3              | F          | 78         | ascending colon           | pT3/pN0     |
| 4              | F          | 81         | biopsy (rectum)           | ND          |
| 5              | M          | 84         | biopsy (hepatic flexure)  | ND          |
| 6              | M          | 70         | biopsy (transverse colon) | ND          |
| 7              | F          | 79         | ascending colon           | ND          |
| 8              | F          | 68         | Unkown                    | ND          |
| 9              | F          | 81         | sigmoid colon             | pT3/pN1     |
| 10             | F          | 74         | biopsy (sigmoid colon)    | ND          |
| 11             | F          | 63         | biopsy (sigmoid colon)    | ND          |
| 12             | M          | 72         | biopsy (hepatic flexure)  | ND          |
| 13             | M          | 76         | rectum                    | pT3/pN0     |
| 14             | M          | 79         | rectum                    | pT3/pN2     |
| 15             | F          | 78         | lung (rectum)             | ND          |
| 16             | M          | 70         | sigmoid colon             | ND          |
| 17             | M          | 83         | biopsy (sigmoid colon)    | ND          |
| 18             | M          | 79         | sigmoid colon             | ND          |
| 19             | M          | 77         | cecum                     | pT3/pN0     |
| 20             | F          | 69         | sigmoid colon             | pT3/pN0     |
| 21             | M          | 36         | small intestine           | ND          |
| 22             | F          | 77         | splenic flexure           | pT3/pN1     |
| 23             | M          | 51         | biopsy (ascending colon)  | ND          |
| 24             | M          | 79         | rectum (mucosa)           | ND          |
| 25             | F          | 81         | splenic flexure           | pT3/pN1     |
| 26             | M          | 50         | biopsy (ascending colon)  | ND          |
| 27             | M          | 70         | sigmoid colon             | ND          |
| 28             | M          | 63         | rectum                    | pT2/pN0     |
| 29             | F          | 59         | sigmoid colon             | pT4/pN2     |
| 30             | M          | 64         | liver (rectum)            | ND          |
| 31             | M          | 70         | ascending colon           | pT3/pN1/pM9 |
| 32             | F          | 55         | cecum                     | pT2/pN2     |
| 33             | F          | 70         | sigmoid colon             | pT3/pN2     |
| 34             | F          | 70         | liver (sigmoid colon)     | ND          |
| 35             | F          | 64         | pleura (rectum)           | ND          |
| 36             | M          | 67         | rectum                    | pT3/pN1     |
| 37             | M          | 60         | ascending colon           | pT4/pN0     |
| 38             | F          | 67         | cecum                     | pT4/pN2     |
| 39             | M          | 81         | biopsy (sigmoid colon)    | ND          |
| 40             | F          | 87         | cecum                     | pT4/pN2     |
| 41             | M          | 71         | biopsy (sigmoid colon)    | ND          |
| 42             | M          | 85         | ascending colon           | pT3/pN2     |
| 43             | F          | 72         | liver (colon)             | ND          |
| 44             | M          | 56         | rectum                    | pT3/pN0     |
| 45             | M          | 71         | liver (descending colon)  | ND          |
| 46             | M          | 77         | rectum                    | pT3/pN1     |
| 47             | M          | 56         | liver (rectum)            | ND          |
| 48             | F          | 78         | ascending colon           | pT4/pN2     |
| 49             | M          | 61         | descending colon          | pT4/pN0     |

|    |   |    |                                 |             |
|----|---|----|---------------------------------|-------------|
| 50 | F | 53 | cecum                           | pT4/pN2     |
| 51 | M | 76 | transverse colon                | pT3/pN1/pM0 |
| 52 | M | 75 | biopsy (rectum)                 | ND          |
| 53 | M | 75 | abdominal wall (sigmioid colon) | ND          |
| 54 | M | 75 | sigmoid colon                   | pT3/pN0/pM0 |
| 55 | M | 62 | biopsy (rectum)                 | ND          |
| 56 | M | 71 | sigmoid colon                   | pT1/pN1     |
| 57 | F | 35 | descending colon                | pT4/pN2/pM1 |
| 58 | F | 69 | ascending colon                 | pT3/pN2/pM9 |
| 59 | F | 72 | liver (rectum)                  | ND          |
| 60 | M | 60 | rectum                          | pT4/pN2/pM0 |
| 61 | M | 58 | sigmoid colon                   | pT3/pN2/pM1 |
| 62 | M | 86 | rectum (mucosa)                 | ND          |
| 63 | M | 63 | rectum                          | pT3/pN1     |
| 64 | F | 78 | rectum                          | pT3/pN1     |
| 65 | M | 73 | sigmoid colon                   | pT4/pN0     |
| 66 | M | 52 | biopsy (sigmoid colon)          | ND          |
| 67 | M | 88 | liver (rectum)                  | ND          |
| 68 | F | 68 | descending colon                | ND          |
| 69 | F | 65 | sigmoid colon                   | pT3/pN2     |
| 70 | F | 82 | biopsy (rectum)                 | ND          |
| 71 | M | 68 | sigmoid colon (mucosa)          | ND          |
| 72 | F | 57 | biopsy (rectum)                 | ND          |
| 73 | M | 82 | biopsy (rectum)                 | ND          |
| 74 | M | 75 | acites fluid                    | ND          |
| 75 | M | 71 | rectum                          | pT3/pN2/pM9 |
| 76 | M | 82 | biopsy (ascending colon)        | ND          |
| 77 | M | 53 | liver (rectum)                  | ND          |
| 78 | M | 77 | lung (rectum)                   | ND          |
| 79 | F | 75 | liver (rectum)                  | ND          |
