# Supplementary material for: SensiScreen® KRAS exon 2-sensitive simplex and multiplex real-time PCR-based assays for detection of KRAS exon 2 mutations
Source: PubMed Central journal article supplement (PMC5479524; doi:10.1371/journal.pone.0178027), 2017-06-21
Supplement: pone.0178027.s008.pdf [file pone.0178027.s008.pdf]

**S5 Table**

| <b>Patient</b> | <b>Sex</b> | <b>Age</b> | <b>Localization</b>   | <b>TNM</b> |
|----------------|------------|------------|-----------------------|------------|
| 1              | F          | 48         | rectum                | pT4/pN0    |
| 2              | M          | 84         | sigmoid colon         | pT3/pN2    |
| 3              | F          | 75         | sigmoid colon         | pT3/pN0    |
| 4              | F          | 54         | sigmoid colon         | pT3/pN1    |
| 5              | M          | 86         | rectum                | pT3/pN2    |
| 6              | F          | 51         | splenic flexure       | pT3/pN0    |
| 7              | F          | 81         | transverse colon      | pT4/pN2    |
| 8              | M          | 81         | rectum                | pT3/pN0    |
| 9              | M          | 82         | rectum                | pT3/pN2    |
| 10             | M          | 30         | transverse colon      | pT3/pN0    |
| 11             | F          | 54         | rectum                | pT3/pN1    |
| 12             | M          | 71         | transverse colon      | pT3/pN0    |
| 13             | F          | 51         | sigmoid colon         | pT4/pN1    |
| 14             | M          | 88         | hepatic flexure       | ND         |
| 15             | F          | 76         | sigmoid colon         | pT2/pN0    |
| 16             | F          | 63         | cecum                 | pT3/pN0    |
| 17             | M          | 52         | rectum                | pT3/pN0    |
| 18             | M          | 72         | polyp (sigmoid colon) | ND         |
| 19             | M          | 68         | rectum (mucosa)       | ND         |
| 20             | F          | 64         | sigmoid colon         | pT4/pN2    |
| 21             | F          | 59         | rectum                | pT3/pN0    |
| 22             | F          | 74         | ascending colon       | pT3/pN0    |
| 23             | F          | 70         | polyp (sigmoid colon) | pT1/ND     |
| 24             | F          | 66         | sigmoid colon         | pT2/pN0    |
| 25             | M          | 82         | rectum                | pT2/pN1    |
| 26             | F          | 78         | ascending colon       | pT3/pN0    |
| 27             | M          | 71         | polyp (cecum)         | ND         |
| 28             | M          | 71         | descending colon      | pT3/pN1    |
| 29             | M          | 63         | cecum                 | pT3/pN0    |
| 30             | M          | 48         | cecum                 | pT4/pN2    |
| 31             | M          | 70         | polyp (sigmoid colon) | ND         |
| 32             | F          | 69         | rectum                | pT3/pN0    |
| 33             | F          | 57         | sigmoid colon         | pT3/pN2    |
| 34             | M          | 64         | sigmoid colon         | pT4/pN1    |
| 35             | F          | 64         | transverse colon      | pT3/pN0    |
| 36             | M          | 77         | polyp (rectum)        | pT1/ND     |
| 37             | M          | 81         | rectum (mucosa)       | ND         |
| 38             | F          | 80         | mamma (colon)         | ND         |
| 39             | M          | 80         | rectum                | pT3/pN0    |
| 40             | M          | 66         | rectum                | pT3/pN0    |
| 41             | M          | 92         | ascending colon       | pT3/pN0    |
| 42             | F          | 82         | hepatic flexure       | pT1/pN0    |
| 43             | F          | 75         | transverse colon      | pT4/pN0    |
| 44             | M          | 78         | sigmoid colon         | pT3/pN2    |
| 45             | F          | 87         | ascending colon       | pT2/pN0    |
| 46             | M          | 55         | polyp (colon/rectum)  | ND         |
| 47             | M          | 58         | liver (colon cancer)  | ND         |
| 48             | F          | 56         | rectum (mucosa)       | ND         |
| 49             | F          | 85         | sigmoid colon         | pT4/pN2    |

|     |   |    |                          |         |
|-----|---|----|--------------------------|---------|
| 50  | M | 67 | rectum                   | pT3/pN0 |
| 51  | M | 60 | hepatic flexure (mucosa) | ND      |
| 52  | M | 49 | rectum                   | pT3/pN0 |
| 53  | M | 78 | rectum                   | pT2/pN0 |
| 54  | M | 82 | rectum                   | pT3/pN0 |
| 55  | M | 73 | transverse colon         | pT3/pN1 |
| 56  | M | 79 | rectum                   | pT1/pN2 |
| 57  | F | 79 | ascending colon          | pT1/pN0 |
| 58  | M | 70 | descending colon         | pT4/pN0 |
| 59  | F | 75 | sigmoid colon            | pT3/pN0 |
| 60  | F | 68 | transverse colon         | pT3/pN0 |
| 61  | M | 56 | descending colon         | pT3/pN0 |
| 62  | F | 93 | hepatic flexure          | pT3/pN0 |
| 63  | F | 66 | polyp (rectum)           | ND      |
| 64  | F | 75 | cecum                    | pT4/pN0 |
| 65  | F | 89 | cecum                    | pT3/pN0 |
| 66  | M | 64 | rectum                   | pT3/pN1 |
| 67  | F | 68 | sigmoid colon            | pT3/pN2 |
| 68  | M | 76 | sigmoid colon            | pT4/pN2 |
| 69  | M | 92 | hepatic flexure          | pT3/pN1 |
| 70  | F | 87 | transverse colon         | pT3/pN1 |
| 71  | F | 76 | transverse colon         | pT3/pN2 |
| 72  | M | 77 | biopsy (rectum)          | ND      |
| 73  | F | 65 | rectum                   | pT3/ND  |
| 74  | F | 77 | descending colon         | pT3/pN1 |
| 75  | M | 82 | biopsy (rectum)          | ND      |
| 76  | F | 63 | biopsy (ascending colon) | ND      |
| 77  | F | 79 | rectum                   | pT2/pN0 |
| 78  | M | 77 | hepatic flexure          | pT3/pN0 |
| 79  | M | 71 | hepatic flexure          | pT3/pN1 |
| 80  | M | 78 | rectum                   | pT1/pN0 |
| 81  | M | 63 | rectum                   | pT2/pN0 |
| 82  | F | 60 | biopsy (cecum)           | ND      |
| 83  | M | 73 | biopsy (sigmoid colon)   | ND      |
| 84  | M | 70 | sigmoid colon            | pT2/pN2 |
| 85  | M | 50 | transverse colon         | pT4/pN1 |
| 86  | F | 56 | polyp (ascending colon)  | ND      |
| 87  | F | 63 | sigmoid colon            | pT3/pN0 |
| 88  | M | 78 | sigmoid colon            | pT4/pN1 |
| 89  | M | 85 | polyp (hepatic flexure)  | ND      |
| 90  | M | 66 | biopsy (mucosa colon)    | ND      |
| 91  | M | 76 | rectum                   | pT3/pN0 |
| 92  | M | 74 | biopsy (ascending colon) | ND      |
| 93  | M | 69 | polyp (sigmoid colon)    | ND      |
| 94  | M | 73 | rectum                   | pT2/pN0 |
| 95  | M | 57 | sigmoid colon            | pT3/pN1 |
| 96  | M | 76 | cecum                    | pT3/pN2 |
| 97  | F | 82 | rectum                   | pT4/pN1 |
| 98  | M | 64 | rectum                   | pT2/pN0 |
| 99  | M | 69 | transverse colon         | pT3/pN0 |
| 100 | M | 77 | rectum                   | pT3/pN1 |
| 101 | M | 87 | liver (rectum)           | ND      |

|     |   |    |                              |         |
|-----|---|----|------------------------------|---------|
| 102 | M | 76 | ascending colon              | pT3/pN0 |
| 103 | F | 71 | descending colon             | pT4/pN1 |
| 104 | F | 87 | rectum                       | pT3/pN1 |
| 105 | F | 67 | rectum                       | pT2/pN0 |
| 106 | M | 63 | rectum                       | pT4/pN2 |
| 107 | M | 73 | sigmoid colon                | pT3/pN0 |
| 108 | M | 74 | sigmoid colon                | pT4/pN2 |
| 109 | M | 82 | transverse colon             | pT4/pN0 |
| 110 | F | 62 | rectum                       | pT3/pN0 |
| 111 | M | 72 | rectum                       | pT3/pN2 |
| 112 | F | 78 | sigmoid colon                | pT4/pN2 |
| 113 | F | 53 | sigmoid colon                | pT3/pN0 |
| 114 | M | 82 | biopsy (rectum)              | ND      |
| 115 | F | 81 | sigmoid colon                | pT3/pN1 |
| 116 | F | 84 | polyp (ascending colon)      | pT1/pN0 |
| 117 | F | 90 | polyp (rectum/sigmoid colon) | pT2/pN0 |
| 118 | F | 54 | transverse colon             | pT3/pN1 |
| 119 | F | 64 | polyp (rectum)               | ND      |
| 120 | F | 74 | sigmoid colon                | pT2/pN0 |
| 121 | F | 51 | rectum                       | pT3/pN1 |
| 122 | M | 79 | rectum                       | pT4/pN2 |
| 123 | F | 85 | polyp (sigmoid colon)        | ND      |
| 124 | M | 92 | rectum                       | pT1/ND  |
| 125 | M | 72 | polyp (sigmoid colon)        | ND      |
| 126 | F | 72 | polyp (sigmoid colon)        | ND      |
| 127 | F | 75 | rectum                       | pT1/pN0 |
| 128 | F | 56 | splenic flexure              | pT4/pN2 |
| 129 | M | 74 | rectum                       | pT3/pN1 |
| 130 | F | 84 | hepatic flexure              | pT3/pN1 |
| 131 | M | 68 | urine bladder (rectum)       | ND      |
| 132 | M | 31 | rectum                       | pT3/pN0 |
| 133 | M | 59 | rectum                       | pT3/pN1 |
| 134 | M | 71 | rectum                       | pT3/pN0 |
| 135 | M | 66 | rectum                       | pT3/pN1 |
| 136 | M | 84 | sigmoid colon                | pT2/pN0 |
| 137 | M | 72 | rectum                       | pT3/pN1 |
| 138 | F | 80 | liver (rectum)               | ND      |
| 139 | M | 60 | rectum                       | pT3/pN0 |
| 140 | M | 71 | rectum                       | pT3/pN0 |
| 141 | M | 68 | urine bladder (rectum)       | ND      |
| 142 | M | 68 | ascending colon              | pT4/pN2 |
| 143 | M | 55 | biopsy (rectum mucosa)       | ND      |
| 144 | M | 76 | transverse colon             | pT3/pN1 |
| 145 | M | 76 | polyp (sigmoid colon)        | ND      |
| 146 | M | 67 | hepatic flexure              | pT2/pN0 |
| 147 | M | 69 | sigmoid colon                | pT4/pN0 |
| 148 | F | 79 | rectum                       | pT3/pN0 |
| 149 | F | 90 | transverse colon             | pT4/pN0 |
| 150 | M | 80 | rectum                       | pT2/pN0 |
| 151 | F | 71 | transverse colon             | pT3/pN0 |
| 152 | M | 81 | sigmoid colon                | pT1/pN0 |
| 153 | M | 63 | rectum                       | pT3/pN0 |

|     |   |    |                         |             |
|-----|---|----|-------------------------|-------------|
| 154 | M | 66 | sigmoid colon           | pT3/pN0     |
| 155 | F | 71 | cecum                   | pT3/pN0     |
| 156 | F | 59 | sigmoid colon           | pT2/pN0     |
| 157 | F | 69 | cecum                   | pT3/pN0     |
| 158 | F | 78 | sigmoid colon           | pT2/pN0     |
| 159 | M | 57 | sigmoid colon           | pT3/pN2     |
| 160 | M | 63 | rectum                  | pT2/pN0     |
| 161 | F | 73 | biopsy (rectum)         | ND          |
| 162 | F | 71 | cecum                   | pT4/pN2/pM1 |
| 163 | F | 69 | polyp (ascending colon) | ND          |
| 164 | F | 63 | sigmoid colon           | pT3/pN1     |
| 165 | M | 83 | ascending colon         | pT3/pN0     |
| 166 | M | 76 | sigmoid colon           | pT3/pN2     |
| 167 | F | 71 | sigmoid colon           | pT2/pN1     |
| 168 | M | 78 | hepatic flexure         | pT3/pN0     |
| 169 | F | 86 | sigmoid colon           | pT4/pN0     |
| 170 | M | 72 | rectum                  | pT3/pN1     |
| 171 | M | 74 | rectum                  | pT3/pN0     |
| 172 | M | 65 | liver (rectum)          | ND          |
| 173 | M | 65 | liver (rectum)          | ND          |
| 174 | M | 68 | sigmoid colon           | pT2/pN0/pM0 |
| 175 | F | 74 | ascending colon         | pT2/pN0     |
| 176 | M | 28 | splenic flexure         | pT4/pN2     |
| 177 | M | 62 | rectum                  | pT3/pN0     |
| 178 | F | 74 | rectum                  | pT3/pN2     |
| 179 | M | 86 | sigmoid colon           | pT4/pN0     |
| 180 | F | 96 | sigmoid colon           | pT4/pN2     |
| 181 | M | 46 | rectum                  | pT4/pN0     |
| 182 | M | 80 | rectum                  | pT4/pN2/pM1 |
| 183 | M | 58 | rectum                  | pT2/pN0     |
| 184 | F | 68 | descending colon        | pT4/pN0     |
| 185 | M | 67 | rectum                  | pT3/pN2     |
| 186 | M | 87 | descending colon        | pT2/pN0     |
| 187 | F | 65 | rectum                  | pT3/pN0     |
| 188 | M | 71 | rectum                  | pT3/pN0     |
| 189 | M | 66 | polyp (ascending colon) | ND          |
| 190 | M | 77 | ascending colon         | pT4/pN1     |
| 191 | F | 74 | ascending colon         | pT3/pN2     |
| 192 | M | 82 | rectum                  | pT3/pN1     |
| 193 | M | 88 | rectum                  | pT2/pN1     |
| 194 | M | 70 | sigmoid colon           | pT4/pN2     |
| 195 | F | 87 | ascending colon         | pT2/pN0     |
| 196 | F | 65 | biopsy (rectum)         | ND          |
| 197 | M | 80 | descending colon        | pT4/pN1     |
| 198 | M | 61 | descending colon        | pT3/pN0     |
| 199 | M | 61 | transvere colon         | pT3/pN0     |
| 200 | M | 79 | sigmoid colon           | pT3/pN0     |
| 201 | M | 72 | sigmoid colon           | pT3/pN2     |
| 202 | M | 68 | rectum                  | pT3/pN0     |
| 203 | M | 84 | ascending colon         | pT3/pN1     |
| 204 | F | 77 | descending colon        | pT3/pN0     |
| 205 | F | 82 | ascending colon         | pT4/pN2     |

|     |   |    |                               |             |
|-----|---|----|-------------------------------|-------------|
| 206 | M | 73 | cecum                         | pT4/pN1/pM1 |
| 207 | F | 80 | rectum                        | pT3/pN0     |
| 208 | M | 62 | ascending colon               | pT3/pN1     |
| 209 | F | 74 | cecum                         | pT3/pN0     |
| 210 | M | 64 | descending colon              | pT3/pN0     |
| 211 | M | 62 | transvere colon               | pT4/pN1     |
| 212 | M | 82 | rectum                        | pT2/pN0     |
| 213 | F | 77 | cecum                         | pT4/pN0     |
| 214 | F | 82 | descending colon              | pT2/pN1     |
| 215 | M | 62 | polyp (rectum)                | ND          |
| 216 | M | 52 | polyp (rectum)                | ND          |
| 217 | F | 70 | descending colon              | pT4/pN2     |
| 218 | F | 62 | ascending colon               | pT3/pN2     |
| 219 | M | 74 | rectum                        | pT1/pN0     |
| 220 | M | 66 | splenic flexure               | pT3/pN2     |
| 221 | F | 68 | sigmoid colon                 | pT3/pN2     |
| 222 | M | 72 | biopsy (rectum/sigmoid colon) | ND          |
| 223 | M | 69 | descending colon              | pT3/pN0     |
| 224 | M | 71 | biopsy (rectum)               | ND          |
| 225 | M | 77 | ascending colon               | pT3/pN2     |
| 226 | M | 71 | sigmoid colon                 | pT1/pN0     |
| 227 | M | 62 | rectum                        | pT3/pN2     |
| 228 | M | 80 | transvere colon               | pT4/pN0     |
| 229 | M | 75 | sigmoid colon                 | pT1/pN0     |
| 230 | F | 82 | cecum                         | pT3/pN0     |
| 231 | F | 68 | rectum                        | pT3/pN0     |
| 232 | M | 76 | sigmoid colon                 | pT4/pN1     |
| 233 | F | 65 | rectum/sigmoid colon          | ND          |
| 234 | M | 77 | ascending colon               | pT3/pN0     |
| 235 | F | 74 | rectum                        | pT3/pN2     |
| 236 | M | 69 | sigmoid colon                 | pT2/pN0     |
| 237 | F | 67 | rectum                        | pT3/pN0     |
| 238 | M | 75 | cecum                         | pT2/pN0     |
| 239 | F | 76 | ascending colon               | pT3/pN0     |
| 240 | M | 83 | ascending colon               | pT3/pN1     |
| 241 | F | 73 | brain (colon cancer)          | ND          |
| 242 | F | 90 | hepatic flexure               | pT3/pN0     |
| 243 | M | 77 | ascending colon               | pT3/pN0     |
| 244 | M | 76 | sigmoid colon                 | pT4/pN1     |
| 245 | F | 87 | sigmoid colon                 | pT3/pN0     |
| 246 | M | 76 | transvere colon               | pT4/pN0     |
| 247 | M | 80 | rectum (recidive)             | ND          |
| 248 | M | 64 | descending colon              | pT3/pN2     |
| 249 | M | 82 | rectum                        | pT3/pN1     |
| 250 | M | 55 | rectum                        | pT3/pN2     |
| 251 | M | 83 | sigmoid colon                 | pT4/pN1     |
| 252 | F | 61 | polyp (rectum)                | ND          |
| 253 | M | 88 | sigmoid colon                 | pT2/pN0     |
| 254 | M | 64 | ascending colon               | pT2/pN0     |
| 255 | F | 69 | transvere colon               | pT4/pN2     |
| 256 | M | 67 | ascending colon               | pT3/pN2     |
| 257 | F | 82 | sigmoid colon                 | pT3/pN0     |

|     |   |    |                        |         |
|-----|---|----|------------------------|---------|
| 258 | F | 46 | rectum                 | pT3/pN1 |
| 259 | M | 70 | rectum                 | pT3/pN1 |
| 260 | F | 72 | rectum / sigmoid colon | pT4/pN2 |
| 261 | M | 74 | rectum                 | pT3/pN0 |
| 262 | M | 74 | small intestine        | ND      |
| 263 | F | 68 | descending colon       | pT3/pN0 |
| 264 | M | 83 | cecum                  | pT2/pN0 |
| 265 | M | 75 | ascending colon        | pT2/pN0 |
| 266 | M | 61 | rectum                 | pT3/pN1 |
| 267 | M | 69 | descending colon       | pT3/pN1 |
| 268 | M | 66 | biposy (rectum)        | ND      |
| 269 | M | 73 | splenic flexure        | pT4/pN2 |
| 270 | F | 72 | hepatic flexure        | pT2/pN0 |
| 271 | M | 82 | rectum                 | pT3/pN0 |
| 272 | F | 68 | rectum                 | pT4/pN0 |
| 273 | M | 80 | rectum/sigmoid colon   | pT4/pN0 |
| 274 | M | 80 | descending colon       | pT3/pN0 |
| 275 | M | 81 | ascending colon        | pT3/pN1 |
| 276 | M | 77 | ascending colon        | pT3/pN1 |
| 277 | F | 69 | sigmoid colon          | pT2/pN0 |
| 278 | M | 63 | sigmoid colon          | pT3/pN2 |
| 279 | M | 71 | cecum                  | pT3/pN1 |
| 280 | M | 79 | sigmoid colon          | pT3/pN0 |
| 281 | M | 68 | rectum / sigmoid colon | pT4/pN2 |
| 282 | F | 66 | rectum                 | pT4/pN1 |
| 283 | M | 52 | sigmoid colon          | pT2/pN1 |
