# Supplementary material for: SensiScreen® KRAS exon 2-sensitive simplex and multiplex real-time PCR-based assays for detection of KRAS exon 2 mutations
Source: PubMed Central journal article supplement (PMC5479524; doi:10.1371/journal.pone.0178027), 2017-06-21
Supplement: pone.0178027.s009.pdf [file pone.0178027.s009.pdf]

**S6 Table**

| Cohort 1 |      |             |               |                        |           |             |              |
|----------|------|-------------|---------------|------------------------|-----------|-------------|--------------|
| n        | DS   | ME-PCR      | SensiScreen®* | n                      | DS        | ME-PCR      | SensiScreen® |
| 1        | WT   | WT          | WT            | 51                     | G13D      | G13D        | G13D         |
| 2        | WT   | WT          | WT            | 52                     | WT        | WT          | WT           |
| 3        | WT   | WT          | WT            | 53                     | G12D      | G12D        | G12D         |
| 4        | WT   | WT          | WT            | 54                     | WT        | WT          | WT           |
| 5        | WT   | G12C        | G12C          | 55                     | WT        | WT          | WT           |
| 6        | WT   | WT          | WT            | 56                     | G12D      | G12D        | G12D         |
| 7        | WT   | WT          | WT            | 57                     | WT        | WT          | WT           |
| 8        | WT   | WT          | WT            | 58                     | G12D      | G12D        | G12D         |
| 9        | WT   | WT          | WT            | 59                     | WT        | WT          | WT           |
| 10       | G12D | G12D        | G12D          | 60                     | G13D      | G13D        | G13D         |
| 11       | WT   | WT          | WT            | 61                     | G12D      | G12D        | G12D         |
| 12       | WT   | WT          | WT            | 62                     | WT        | WT          | WT           |
| 13       | G12A | G12A        | G12A          | 63                     | WT        | <b>G12C</b> | <b>G12C</b>  |
| 14       | WT   | WT          | WT            | 64                     | WT        | WT          | WT           |
| 15       | WT   | WT          | WT            | 65                     | G13D      | G13D        | G13D         |
| 16       | WT   | WT          | WT            | 66                     | WT        | WT          | WT           |
| 17       | WT   | WT          | WT            | 67                     | WT        | WT          | WT           |
| 18       | WT   | <b>G13D</b> | <b>G13D</b>   | 68                     | WT        | <b>G12C</b> | <b>G12C</b>  |
| 19       | WT   | WT          | WT            | 69                     | G12V      | G12V        | G12V         |
| 20       | WT   | WT          | WT            | 70                     | G12D      | G12D        | G12D         |
| 21       | G12V | G12V        | G12V          | 71                     | WT        | WT          | WT           |
| 22       | WT   | WT          | WT            | 72                     | WT        | <b>G12V</b> | <b>G12V</b>  |
| 23       | WT   | WT          | WT            | 73                     | WT        | WT          | WT           |
| 24       | WT   | WT          | WT            | 74                     | WT        | WT          | WT           |
| 25       | WT   | WT          | WT            | 75                     | WT        | WT          | WT           |
| 26       | WT   | WT          | WT            | 76                     | WT        | <b>G12C</b> | <b>G12C</b>  |
| 27       | WT   | <b>G12D</b> | <b>G12D</b>   | 77                     | WT        | WT          | WT           |
| 28       | WT   | <b>G12V</b> | <b>G12V</b>   | 78                     | WT        | WT          | WT           |
| 29       | WT   | WT          | WT            | 79                     | WT        | WT          | WT           |
| 30       | G12D | G12D        | G12D          | 80                     | WT        | WT          | WT           |
| 31       | G12V | G12V        | G12V          | 81                     | WT        | WT          | WT           |
| 32       | G12R | G12R        | G12R          | 82                     | WT        | <b>G12V</b> | <b>G12V</b>  |
| 33       | G12S | G12S        | G12S          | 83                     | WT        | WT          | WT           |
| 34       | WT   | WT          | WT            | 84                     | G12C      | G12C        | G12C         |
| 35       | WT   | WT          | WT            | 85                     | G12D      | G12D        | G12D         |
| 36       | G12V | G12V        | G12V          | 86                     | WT        | <b>G12S</b> | <b>G12S</b>  |
| 37       | WT   | WT          | WT            | 87                     | WT        | <b>G12A</b> | <b>G12A</b>  |
| 38       | WT   | WT          | WT            | 88                     | WT        | <b>G12V</b> | <b>G12V</b>  |
| 39       | WT   | WT          | WT            | 89                     | WT        | <b>G13D</b> | <b>G13D</b>  |
| 40       | WT   | WT          | WT            | 90                     | WT        | WT          | WT           |
| 41       | WT   | WT          | WT            | 91                     | WT        | WT          | WT           |
| 42       | G12D | G12D        | G12D          | 92                     | G12D      | G12D        | G12D         |
| 43       | G12C | G12C        | G12C          | 93                     | WT        | WT          | WT           |
| 44       | G12A | G12A        | G12A          | 94                     | WT        | WT          | WT           |
| 45       | G12V | G12V        | G12V          | 95^                    | NE        | NE          | NE           |
| 46       | WT   | WT          | WT            | 96                     | WT        | WT          | WT           |
| 47       | G12V | G12V        | G12V          | 97                     | WT        | <b>G12V</b> | <b>G12V</b>  |
| 48       | G12D | G12D        | G12D          | 98                     | WT        | WT          | WT           |
| 49       | G12V | G12V        | G12V          | 99                     | WT        | WT          | <u>G13D</u>  |
| 50       | G12D | G12D        | G12D          | 100                    | WT        | <b>G12V</b> | <b>G12V</b>  |
|          |      |             |               | <b>n mutated cases</b> | <b>28</b> | <b>43</b>   | <b>44</b>    |
