# Supplementary material for: SensiScreen® KRAS exon 2-sensitive simplex and multiplex real-time PCR-based assays for detection of KRAS exon 2 mutations
Source: PubMed Central journal article supplement (PMC5479524; doi:10.1371/journal.pone.0178027), 2017-06-21
Supplement: pone.0178027.s010.pdf [file pone.0178027.s010.pdf]

# S7 Table

| Cohort 2 |      |              |              |                        |           |              |              |
|----------|------|--------------|--------------|------------------------|-----------|--------------|--------------|
| n        | DS   | therascreen® | SensiScreen® | n                      | DS        | therascreen® | SensiScreen® |
| 1        | WT   | WT           | WT           | 41                     | WT        | WT           | WT           |
| 2        | WT   | WT           | WT           | 42                     | G12A      | G12A         | G12A         |
| 3        | WT   | WT           | WT           | 43                     | WT        | WT           | WT           |
| 4        | WT   | WT           | WT           | 44                     | G12C      | G12C         | G12C         |
| 5        | WT   | WT           | WT           | 45                     | WT        | WT           | WT           |
| 6        | WT   | WT           | WT           | 46                     | WT        | WT           | WT           |
| 7        | WT   | WT           | WT           | 47                     | G13D      | G13D         | G13D         |
| 8        | WT   | WT           | WT           | 48                     | G12S      | G12S         | G12S         |
| 9        | WT   | WT           | WT           | 49                     | G12D      | G12D         | G12D         |
| 10       | WT   | WT           | WT           | 50                     | G12D      | G12D         | G12D         |
| 11       | WT   | WT           | WT           | 51                     | WT        | WT           | WT           |
| 12       | WT   | WT           | WT           | 52                     | WT        | WT           | WT           |
| 13       | WT   | WT           | WT           | 53                     | WT        | WT           | WT           |
| 14       | WT   | WT           | WT           | 54                     | WT        | WT           | WT           |
| 15       | WT   | WT           | WT           | 55                     | WT        | WT           | WT           |
| 16       | WT   | WT           | WT           | 56                     | G13D      | G13D         | G13D         |
| 17       | WT   | WT           | WT           | 57                     | WT        | WT           | WT           |
| 18       | WT   | WT           | WT           | 58                     | G13D      | G13D         | G13D         |
| 19       | WT   | WT           | WT           | 59                     | WT        | <b>G12S</b>  | <b>G12S</b>  |
| 20       | WT   | WT           | WT           | 60                     | G12A      | G12A         | G12A         |
| 21       | WT   | WT           | WT           | 61                     | WT        | WT           | WT           |
| 22       | WT   | WT           | WT           | 62                     | WT        | WT           | WT           |
| 23       | WT   | WT           | WT           | 63                     | G12V      | G12V         | G12V         |
| 24       | WT   | WT           | WT           | 64                     | WT        | WT           | WT           |
| 25       | WT   | WT           | WT           | 65                     | WT        | WT           | WT           |
| 26       | WT   | WT           | WT           | 66                     | WT        | WT           | WT           |
| 27       | WT   | WT           | WT           | 67                     | G13D      | G13D         | G13D         |
| 28       | WT   | WT           | WT           | 68                     | WT        | WT           | WT           |
| 29       | WT   | WT           | WT           | 69                     | G13D      | G13D         | G13D         |
| 30       | WT   | WT           | WT           | 70                     | WT        | <b>G12C</b>  | <b>G12C</b>  |
| 31       | WT   | WT           | WT           | 71                     | WT        | WT           | WT           |
| 32       | WT   | WT           | WT           | 72                     | WT        | WT           | WT           |
| 33       | WT   | WT           | WT           | 73                     | G12C      | G12C         | G12C         |
| 34       | WT   | WT           | WT           | 74                     | G12V      | G12V         | G12V         |
| 35       | WT   | WT           | WT           | 75                     | WT        | WT           | WT           |
| 36       | G12D | G12D         | G12D         | 76                     | WT        | WT           | WT           |
| 37       | G12D | G12D         | G12D         | 77                     | WT        | WT           | WT           |
| 38       | G12V | G12V         | G12V         | 78                     | WT        | WT           | WT           |
| 39       | WT   | WT           | WT           | 79                     | WT        | WT           | WT           |
| 40       | WT   | WT           | WT           |                        |           |              |              |
|          |      |              |              | <b>n mutated cases</b> | <b>17</b> | <b>19</b>    | <b>19</b>    |
